# Supplementary material for: Overexpression of llm1 Affects the Synthesis of Secondary Metabolites of Aspergillus cristatus
Source: MDPI journal article supplement (doi:10.3390/microorganisms10091707), 2022-08-24
Supplement: s1 [file s1]

**Table S1** Primers used in this study

| Primer      | Sequence                                  |
|-------------|-------------------------------------------|
| Llm1F       | agacatcaccatggtagatctCCTTGTGGCTACGGAGTGCA |
| Llm1R       | ggggaaattcgagctgggtaccGCCGCCCGCAACTTAATC  |
| HygroF      | ATCGTTATGTTTATCGGCACT                     |
| HygroR      | TGGCGACCTCGTATTGG                         |
| QLlm1F      | AGTCCAAATCATCGTCCCG                       |
| QLlm1R      | GCTCCAACCTCCTCCACTCC                      |
| GAPDHF      | CTGCCGTATCGAGAAGGGTG                      |
| GAPDHR      | GATGAAGTTGGGGTTGAGGG                      |
| SI65_03722F | GGGAAGCGTATGAGAAGAT                       |
| SI65_03722R | ATTGAAAAGAACAGGGGAC                       |
| SI65_05768F | GATAGTTTGGCTGGATTGC                       |
| SI65_05768R | TCCTTACCCTTGGTGAGAG                       |
| SI65_08405F | TTTGAGTGGAACGAGGAGT                       |
| SI65_08405R | GGTGTCGGGTGTAGATGTC                       |
| SI65_05769F | GTGTGCTTGCGGGTAATCC                       |
| SI65_05769R | ATCGCCATGCCAGTGGGTG                       |
| SI65_09735F | TCTGTTTTATCGGTGTTTG                       |
| SI65_09735R | TGGTAGGAAAGATGGGCAG                       |
| SI65_01982F | CAAAAGCCATACAACCAGG                       |
| SI65_01982R | CACTAACTCCAATGACCCA                       |
| SI65_06672F | TTCAGCAAGAACGCAGCAG                       |
| SI65_06672R | CGTAACCCTAGCAAGACCG                       |
