# Supplementary material for: Overexpression of llm1 Affects the Synthesis of Secondary Metabolites of Aspergillus cristatus
Source: MDPI journal article supplement (doi:10.3390/microorganisms10091707), 2022-08-24
Supplement: s1 [file s1]

**Table S3** Mapping statistics of RNA-seq data

| <b>Sample</b>       | <b>Raw reads</b> | <b>Clean reads</b> | <b>Clean Ratio</b> | <b>Q20(%)</b> | <b>Q30(%)</b> | <b>GC content(%)</b> |
|---------------------|------------------|--------------------|--------------------|---------------|---------------|----------------------|
| OE:: <i>llm1</i> _1 | 56132880         | 55763098           | 0.993412381        | 98.36         | 95.09         | 54.22                |
| OE:: <i>llm1</i> _2 | 63294932         | 62772572           | 0.991747207        | 98.4          | 95.18         | 54.32                |
| OE:: <i>llm1</i> _3 | 52481180         | 52067124           | 0.992110391        | 98.33         | 95.02         | 54.36                |
| WT_1                | 52014002         | 51659080           | 0.993176414        | 98.41         | 95.24         | 54.22                |
| WT_2                | 57594222         | 57246210           | 0.993957519        | 98.43         | 95.26         | 54.19                |
| WT_3                | 58672768         | 58282756           | 0.993352759        | 98.42         | 95.25         | 54.26                |
