# Supplementary material for: Overexpression of llm1 Affects the Synthesis of Secondary Metabolites of Aspergillus cristatus
Source: MDPI journal article supplement (doi:10.3390/microorganisms10091707), 2022-08-24
Supplement: s1 [file s1]

**Table S5** Significantly differentially expressed secondary metabolite synthesis genes screened based on transcriptome data and antiSMASH annotation.

| Gene_ID    | Cluster ID | LOG2 (FC) | P-adjust | Regulate |
|------------|------------|-----------|----------|----------|
| SI65_01982 | Cluster4   | -1.96     | 2.69e-10 | down     |
| SI65_08474 | Cluster10  | -2.82     | 6.04e-77 | down     |
| SI65_08573 | Cluster11  | -1.55     | 0.001033 | down     |
| SI65_02863 | Cluster16  | -1.46     | 0.000007 | down     |
| SI65_09734 | Cluster17  | -1.44     | 0.003393 | down     |
| SI65_09735 | Cluster17  | -1.79     | 3.87e-59 | down     |
| SI65_09798 | Cluster18  | -1.35     | 0.000002 | down     |
| SI65_09799 | Cluster18  | -2.23     | 1.59e-30 | down     |
| SI65_10009 | Cluster20  | -1.87     | 0.000016 | down     |
| SI65_10012 | Cluster20  | -4.32     | 0.000011 | down     |
| SI65_10092 | Cluster21  | -1.18     | 0.024799 | down     |
| SI65_03265 | Cluster23  | -2.08     | 7.64e-10 | down     |
| SI65_03266 | Cluster23  | -2.19     | 3.89e-11 | down     |
| SI65_03269 | Cluster23  | -2.15     | 1.59e-9  | down     |
| SI65_03270 | Cluster23  | -2.57     | 6.67e-20 | down     |
| SI65_03271 | Cluster23  | -1.53     | 1.05e-28 | down     |
| SI65_03272 | Cluster23  | -1.30     | 1.79e-23 | down     |
| SI65_03273 | Cluster23  | -1.41     | 9.85e-20 | down     |
| SI65_03275 | Cluster23  | -1.55     | 4.02e-22 | down     |
| SI65_03276 | Cluster23  | -2.89     | 0.006066 | down     |
| SI65_03776 | Cluster25  | -2.44     | 3.31e-66 | down     |
| SI65_05416 | Cluster31  | -1.40     | 0.023200 | down     |
| SI65_05422 | Cluster31  | -3.38     | 2.08e-18 | down     |
| SI65_06672 | Cluster34  | -2.61     | 4.39e-11 | down     |
| SI65_06673 | Cluster34  | -2.11     | 2.12e-37 | down     |
| SI65_06674 | Cluster34  | -2.44     | 4.13e-62 | down     |
| SI65_06675 | Cluster34  | -3.65     | 0.000876 | down     |
| SI65_07257 | Cluster36  | -3.64     | 1.38e-15 | down     |
| SI65_07680 | Cluster5   | 2.19      | 9.11e-10 | up       |
| SI65_08206 | Cluster7   | 1.47      | 8.84e-7  | up       |
| SI65_08207 | Cluster7   | 1.98      | 3.16e-8  | up       |
| SI65_08318 | Cluster8   | 1.79      | 6.17e-9  | up       |
| SI65_08405 | Cluster9   | 1.82      | 3.42e-10 | up       |
| SI65_08578 | Cluster11  | 1.82      | 0.000510 | up       |
| SI65_09732 | Cluster17  | 1.82      | 1.85e-10 | up       |
| SI65_09733 | Cluster17  | 1.25      | 5.89e-11 | up       |
| SI65_10002 | Cluster20  | 5.46      | 0        | up       |
| SI65_10096 | Cluster21  | 1.27      | 7.34e-12 | up       |
| SI65_03283 | Cluster23  | 3.25      | 0        | up       |
| SI65_03722 | Cluster24  | 1.48      | 5.51e-24 | up       |
| SI65_03723 | Cluster24  | 1.86      | 1.12e-18 | up       |

---

|            |           |      |          |    |
|------------|-----------|------|----------|----|
| SI65_03724 | Cluster24 | 1.20 | 3.27e-14 | up |
| SI65_03725 | Cluster24 | 1.76 | 2.96e-36 | up |
| SI65_04502 | Cluster27 | 1.40 | 1.51e-22 | up |
| SI65_04506 | Cluster27 | 1.91 | 5.53e-10 | up |
| SI65_05234 | Cluster30 | 1.28 | 1.90e-11 | up |
| SI65_05762 | Cluster32 | 1.26 | 3.17e-40 | up |
| SI65_05764 | Cluster32 | 1.98 | 5.55e-43 | up |
| SI65_05767 | Cluster32 | 2.01 | 1.08e-7  | up |
| SI65_05768 | Cluster32 | 3.51 | 5.976e-9 | up |
| SI65_05769 | Cluster32 | 2.97 | 1.70e-10 | up |
| SI65_05770 | Cluster32 | 3.03 | 1.31e-9  | up |
| SI65_05771 | Cluster32 | 3.49 | 8.70e-10 | up |
| SI65_05772 | Cluster32 | 3.51 | 1.51e-12 | up |
| SI65_05773 | Cluster32 | 4.21 | 2.32e-11 | up |
| SI65_07248 | Cluster36 | 1.25 | 5.46e-32 | up |
| SI65_07249 | Cluster36 | 1.12 | 8.33e-21 | up |
| SI65_07250 | Cluster36 | 2.22 | 7.45e-18 | up |
| SI65_07251 | Cluster36 | 1.38 | 1.53e-31 | up |
| SI65_07252 | Cluster36 | 1.28 | 4.92e-33 | up |

---
