# Supplementary material for: Overexpression of llm1 Affects the Synthesis of Secondary Metabolites of Aspergillus cristatus
Source: Microorganisms. 2022 Aug 24;10(9):1707. doi: 10.3390/microorganisms10091707 (PMC9502445; doi:10.3390/microorganisms10091707)
Supplement: Supplementary file 1 [file microorganisms-10-01707-s001.zip]

Archive with 6 entries (6 files):
- Support Figures.pdf
- Table_S1.pdf
- Table_S2.xlsx
- Table_S3.pdf
- Table_S4.xlsx
- Table_S5.pdf
