# Supplementary material for: Overexpression of llm1 Affects the Synthesis of Secondary Metabolites of Aspergillus cristatus
Source: Microorganisms. 2022 Aug 24;10(9):1707. doi: 10.3390/microorganisms10091707 (PMC9502445; doi:10.3390/microorganisms10091707)
Supplement: Supplementary file 1 [file microorganisms-10-01707-s001.zip › Table_S2.xlsx]

## Sheet: Sheet1
Metabolite	M/Z	Formula	Retention time	VIP	FC(OE::llm1/WT)	p-value	HMDB Superclass
Sulindac sulfone	373.092	C20H17FO4S	5.20265	2.21	1.80316	0.002366	Benzenoids
Alpha-Linolenoyl ethanolamide	366.266	C20H35NO2	8.31255	2.19	1.71639	0.005875	Organic nitrogen compounds
Propinol adenylate	384.074	C13H18N5O8P	4.04757	1.76	1.95979	0.01118	Nucleosides, nucleotides, and analogues
DCMP	659.112	C9H14N3O7P	6.56752	1.95	0.503618	0.003388	Nucleosides, nucleotides, and analogues
PD 98059	268.096	C16H13NO3	4.68233	1.95	1.75891	0.02425	Phenylpropanoids and polyketides
Ovalitenone	339.085	C19H14O6	3.6009	2.06	1.69207	0.0002884	Phenylpropanoids and polyketides
Tricin 7-[feruloyl-(->2)-glucuronyl-(1->2)-glucuronide]	903.154	C39H38O22	5.5183	1.76	0.635097	0.007153	Phenylpropanoids and polyketides
(+/-)-Dulciol E	354.133	C18H16O5	4.03788	2.05	1.78938	0.001125	Organoheterocyclic compounds
Avocadenofuran	231.21	C17H28O	7.80352	1.9	1.50859	0.02978	Organoheterocyclic compounds
1-Isomangostin	428.207	C24H26O6	6.67673	1.56	0.669594	0.03238	Organoheterocyclic compounds
5,10-Methylene-THF	440.17	C20H23N7O6	0.826867	2.3	0.441742	0.003534	Organoheterocyclic compounds
Alanyl-Lysine	256.107	C9H19N3O3	5.36763	3.14	3.45623	0.002573	Organic acids and derivatives
4-Acetamidobutanoic acid	190.071	C6H11NO3	2.8947	2.27	3.08732	0.0003797	Organic acids and derivatives
Glutathione	272.067	C10H17N3O6S	7.29522	2.46	1.97326	0.02813	Organic acids and derivatives
Gamma-Glutamyl-beta-(isoxazolin-5-on-2-yl)alanine	282.073	C11H15N3O7	0.900083	1.86	0.644253	0.005015	Organic acids and derivatives
N-Succinyl-2-amino-6-ketopimelate	579.161	C11H15NO8	4.22703	1.94584	0.535677	0.01235	Organic acids and derivatives
2-Hydroxyestrone-1-S-glutathione	590.219	C28H37N3O9S	3.10613	2.75116	0.301231	0.0009407	Organic acids and derivatives
Chitin	610.245	C16H28N2O11.[C8H13NO5]n	8.71597	3.57526	4.59399	0.0003506	Organic oxygen compounds
Lucuminamide	480.131	C19H27NO11	4.43957	2.70235	3.62389	0.0005703	Organic oxygen compounds
Alpha-Santalyl acetate	263.2	C17H26O2	6.81607	2.09597	1.84766	0.006077	Organic oxygen compounds
Zileuton O-glucuronide	411.088	C17H20N2O8S	7.37928	2.30571	1.60471	0.01683	Organic oxygen compounds
Mocimycin	814.454	C43H60N2O12	8.43798	2.45478	1.56409	0.03823	Organic oxygen compounds
4-Hydroxycyclohexylcarboxylic acid	143.071	C7H12O3	3.54398	2.00085	1.53919	0.02206	Organic oxygen compounds
Monascoflavin	400.212	C21H26O5	5.80162	1.81425	0.607304	0.01948	Organic oxygen compounds
Cis-5-Caffeoylquinic acid	353.088	C16H18O9	3.02522	2.08504	0.577919	0.007706	Organic oxygen compounds
Adhumulone	404.242	C21H30O5	5.93328	2.42438	0.333558	0.001542	Organic oxygen compounds
(S)-Oleuropeic acid	217.142	C10H16O3	4.12603	2.64688	23.7296	0.002344	Lipids and lipid-like molecules
Chenodeoxycholic acid 3-sulfate	437.231	C24H40O7S	8.7928	2.97512	20.1805	0.02124	Lipids and lipid-like molecules
Soyasaponin IV	765.451	C41H66O13	9.03572	3.82414	13.5948	7.654e-06	Lipids and lipid-like molecules
5-Dehydroepisterol	379.335	C28H44O	11.4256	3.43069	5.7383	7.555e-06	Lipids and lipid-like molecules
Gibberellin A62	369.111	C19H22O5	8.46682	3.17773	2.68483	1.055e-05	Lipids and lipid-like molecules
5,8,12-Trihydroxy-9-octadecenoic acid	353.228	C18H34O5	7.05588	2.23599	2.6049	0.04915	Lipids and lipid-like molecules
2-Phenylethyl octanoate	312.191	C16H24O2	4.15903	2.29941	2.51662	0.0169	Lipids and lipid-like molecules
(9Z,11R,12S,13S,15Z)-12,13-Epoxy-11-hydroxy-9,15-octadecadienoic acid	328.248	C18H30O4	7.49653	2.43839	2.39786	0.00411	Lipids and lipid-like molecules
9-HEPE	357.181	C20H30O3	7.71685	2.93928	2.38794	0.01379	Lipids and lipid-like molecules
Corticrocin	515.167	C14H14O4	5.5183	2.0327	2.01328	0.0166	Lipids and lipid-like molecules
4,8 dimethylnonanoyl carnitine	330.263	C18H35NO4	6.82573	1.91658	1.92744	0.02979	Lipids and lipid-like molecules
Palmitoyl glucuronide	460.327	C22H42O7	11.4449	2.19117	1.91424	0.00295	Lipids and lipid-like molecules
2beta,9xi-Dihydroxy-8-oxo-1(10),4,11(13)-germacratrien-12,6alpha-olide	259.097	C15H18O5	6.74743	1.93881	1.76148	0.04147	Lipids and lipid-like molecules
Prostaglandin D3	315.194	C20H30O5	8.5723	1.8116	1.74246	0.001105	Lipids and lipid-like molecules
5,6-Dihydroxyprostaglandin F1a	353.229	C20H36O7	7.4007	2.11083	1.67347	0.01596	Lipids and lipid-like molecules
Corchorifatty acid A	291.195	C18H28O4	6.64557	1.8595	1.58165	0.03399	Lipids and lipid-like molecules
PG(18:3(6Z,9Z,12Z)/22:6(4Z,7Z,10Z,13Z,16Z,19Z))	853.44	C46H73O10P	3.7885	1.70851	0.666049	0.03674	Lipids and lipid-like molecules
Avenestergenin A1	672.362	C38H55NO7	4.24645	2.02472	0.659805	0.002599	Lipids and lipid-like molecules
Gibberellin A87	397.106	C19H22O7	0.780367	1.80664	0.639603	0.0295	Lipids and lipid-like molecules
Dehydroisoandrosterone 3-glucuronide	528.252	C25H36O8	5.74512	2.34786	0.626597	0.01243	Lipids and lipid-like molecules
(+/-)-2,4,8-Trimethyl-7-nonen-2-ol	226.216	C12H24O	7.85135	2.01899	0.591168	0.0008688	Lipids and lipid-like molecules
Malonyl-CoA semialdehyde	879.157	C24H38N7O18P3S	5.48963	2.06939	0.495159	0.04194	Lipids and lipid-like molecules
6-beta-hydroxymedroxyprogesterone	405.225	C22H32O4	4.52975	2.4056	0.473041	0.008458	Lipids and lipid-like molecules
LysoPE(0:0/22:5(4Z,7Z,10Z,13Z,16Z))	572.298	C27H46NO7P	3.80767	2.1702	0.413481	0.0215	Lipids and lipid-like molecules
Dihydroceramide	368.258	C19H39NO3	6.38008	2.37718	0.392319	0.002522	Lipids and lipid-like molecules
Physagulin D	655.329	C34H52O10	9.26143	2.54952	0.385963	0.007407	Lipids and lipid-like molecules
LysoPE(0:0/20:5(5Z,8Z,11Z,14Z,17Z))	520.244	C25H42NO7P	3.88505	2.75391	0.316984	0.002826	Lipids and lipid-like molecules
PS(14:0/14:1(9Z))	714.375	C34H64NO10P	4.42163	3.00188	0.245828	0.0002736	Lipids and lipid-like molecules
Kaempferol 3-[2''-(p-coumaroylglucosyl)rhamnoside]	785.196	C36H36O17	7.86205	3.17121	4.70963	0.0003176	-
Tert-butyl p-Toluate	193.121	C12H16O2	6.58475	2.47124	2.91273	0.01043	-
12-hydroxy-8E,10E-heptadecadienoic acid	283.226	C17H30O3	7.84185	2.42304	2.25369	0.01081	-
6-hydroxysphingosine	316.284	C18H37NO3	6.95038	2.78662	2.24368	0.0006485	-
9S-hydroxy-12R,13S-epoxy-10E,15Z-octadecadienoic acid	311.221	C18H30O4	7.50603	2.53905	2.22129	0.005903	-
2''-O-trans-p-Coumaroylastragalin	577.134	C30H26O13	4.8015	1.82068	1.91057	0.02336	-
N-hexadecanoyl-L-Homoserine lactone	340.284	C20H37NO3	6.93122	2.40978	1.90947	0.008529	-
2-amino-4-({1-[(carboxymethyl)-C-hydroxycarbonimidoyl]-2-{[1-(2,3-dihydroxyphenyl)-3-oxopropyl]sulfanyl}ethyl}-C-hydroxycarbonimidoyl)butanoic acid	504.166	C19H25N3O9S	3.70472	2.2453	1.79519	0.0005803	-
6-{[10-(but-3-enoyl)-3-hydroxy-2,2-dimethyl-8-oxo-6-propyl-2H,3H,4H,8H-pyrano[3,2-g]chromen-5-yl]oxy}-3,4,5-trihydroxyoxane-2-carboxylic acid	587.154	C27H32O12	6.17943	1.95953	1.77391	0.047	-
3-(2,5-dihydroxy-4-methoxyphenyl)-5,7-dihydroxy-6-methoxy-3,4-dihydro-2H-1-benzopyran-4-one	362.096	C17H16O8	0.876867	1.78224	1.7521	0.04986	-
5-ethylbenzene-1,2,3-triol	135.045	C8H10O3	3.9814	1.54992	1.64393	0.02417	-
13-epi-12-oxo Phytodienoic Acid	293.211	C18H28O3	7.60187	2.0617	1.61286	0.01697	-
Kaempferol 3-apiosyl-(1->4)-rhamnoside-7-rhamnoside	711.219	C32H38O18	4.10403	1.62481	1.61195	0.03616	-
Pro Pro Thr Phe	461.239	C23H32N4O6	4.36135	1.70284	1.54092	0.01289	-
5-Hydroxy-7,2',4'-trimethoxy-3',6'-diketoflavone	359.075	C18H14O8	4.33953	1.75961	1.53887	0.007409	-
3,4,5-trihydroxy-6-{[6-(3-hydroxy-3-methylbut-1-en-1-yl)-2-oxo-2H-chromen-7-yl]oxy}oxane-2-carboxylic acid	486.135	C20H22O10	3.81455	1.76188	1.53526	0.01083	-
3,4,5-trihydroxy-6-{[7-methoxy-3-(3-methoxyphenyl)-8-methyl-4-oxo-4H-chromen-5-yl]oxy}oxane-2-carboxylic acid	453.117	C24H24O11	4.60063	1.90473	0.666526	0.00143	-
[(6-{5,7-dihydroxy-4-oxo-2-phenyl-6-[3,4,5-trihydroxy-6-(hydroxymethyl)oxan-2-yl]-4H-chromen-3-yl}-3,4,5-trihydroxyoxan-2-yl)methoxy]sulfonic acid	703.113	C27H30O17S	5.5705	1.82764	0.627369	0.02111	-
6-[5-({[3,5-dihydroxy-2-(hydroxymethyl)-6-(3,4,5-trihydroxybenzoyloxy)oxan-4-yl]oxy}carbonyl)-2,3-dihydroxyphenoxy]-3,4,5-trihydroxyoxane-2-carboxylic acid	659.111	C26H28O20	6.47833	1.75882	0.615033	0.02564	-
6-[2,3-dihydroxy-1-(1-oxo-1H-isochromen-3-yl)butoxy]-3,4,5-trihydroxyoxane-2-carboxylic acid	461.089	C19H22O11	5.4813	1.91054	0.613473	0.002506	-
(3-{3,5,7-trihydroxy-4-[6,9,17,19,21-pentahydroxy-5,13-bis(3-hydroxyphenyl)-4,12,14-trioxapentacyclo[11.7.1.0,.0,.0,]henicosa-2(11),3(8),9,15(20),16,18-hexaen-18-yl]-3,4-dihydro-2H-1-benzopyran-2-yl}phenyl)oxidanesulfonic acid	879.156	C45H36O18S	6.90257	2.16628	0.524874	0.01991	-
Val Val	217.154	C10H20N2O3	3.5129	2.37051	0.5209	0.0002799	-
2-(3,4-dihydroxyphenyl)-5,6,7-trihydroxy-3,4-dihydro-2H-1-benzopyran-3-yl 3,4,5-trihydroxybenzoate	479.063	C22H18O11	4.725	1.62812	0.510873	0.01255	-
12-(3,4-dihydroxyphenyl)-13-hydroxy-6-(4-hydroxy-3-methoxyphenyl)-8-{[3,4,5-trihydroxy-6-(hydroxymethyl)oxan-2-yl]oxy}-3,11-dioxatricyclo[8.4.0.0,]tetradeca-1,7,9-trien-4-one	673.173	C31H32O14	2.34812	2.162	0.450188	0.04474	-
6-{[3-(2,4-dihydroxyphenyl)propanoyl]oxy}-3,4,5-trihydroxyoxane-2-carboxylic acid	339.072	C15H18O10	3.16225	2.28081	0.420882	0.002009	-
Schaftoside 6''-O-glucoside	727.214	C32H38O19	4.42768	2.52097	0.294533	0.009035
