# Supplementary material for: Overexpression of llm1 Affects the Synthesis of Secondary Metabolites of Aspergillus cristatus
Source: Microorganisms. 2022 Aug 24;10(9):1707. doi: 10.3390/microorganisms10091707 (PMC9502445; doi:10.3390/microorganisms10091707)
Supplement: Supplementary file 1 [file microorganisms-10-01707-s001.zip › Table_S4.xlsx]

## Sheet: Sheet1
Gene name	Gene description	Log2FC(OE::llm1/WT)	p-adjust	Regulate
SI65_10002	hypothetical protein	5.49456	0	up
SI65_03283	hypothetical protein	3.2486	0	up
SI65_00085	hypothetical protein	-5.89167	4.56607e-210	down
SI65_09424	hypothetical protein	5.12201	3.39424e-163	up
SI65_08775	hypothetical protein	-6.60825	7.19414e-139	down
SI65_06045	hypothetical protein	-11.6335	4.36028e-121	down
SI65_03332	hypothetical protein	-3.49819	4.55025e-120	down
SI65_02723	hypothetical protein	-3.43301	4.78283e-118	down
SI65_03676	putative metallocarboxypeptidase ecm14	3.95109	3.55872e-112	up
SI65_02187	hypothetical protein	5.09256	1.10089e-109	up
SI65_06585	hypothetical protein	-2.18858	1.57306e-82	down
SI65_08474	hypothetical protein	-2.81872	6.04319e-77	down
SI65_08410	hypothetical protein	-3.31198	3.99129e-76	down
SI65_03923	hypothetical protein	1.76788	3.32303e-75	up
SI65_06019	hypothetical protein	-4.10443	2.46257e-74	down
SI65_05591	hypothetical protein	-2.32416	7.48815e-67	down
SI65_03776	hypothetical protein	-2.43876	3.30899e-66	down
SI65_04343	hypothetical protein	1.97771	5.61613e-64	up
SI65_06674	hypothetical protein	-2.4448	4.1331e-62	down
SI65_05592	hypothetical protein	-2.45704	3.9703e-61	down
SI65_08987	hypothetical protein	1.65117	9.78708e-61	up
SI65_09735	hypothetical protein	-1.78501	3.87333e-59	down
SI65_04691	hypothetical protein	-1.63101	4.97995e-53	down
SI65_01409	putative beta-glucosidase A	-2.49086	4.97995e-53	down
SI65_02365	hypothetical protein	1.9767	3.46364e-52	up
SI65_04387	hypothetical protein	-2.67257	6.71973e-47	down
SI65_02182	hypothetical protein	1.63307	1.04934e-46	up
SI65_05540	hypothetical protein	-1.48918	1.96416e-45	down
SI65_01398	hypothetical protein	2.10182	1.89787e-43	up
SI65_05764	hypothetical protein	1.97937	5.55146e-43	up
SI65_05587	putative scytalone dehydratase	-2.02623	6.49532e-43	down
SI65_08059	putative ribose 5-phosphate isomerase	-1.69974	2.60383e-41	down
SI65_02406	hypothetical protein	1.53966	1.51454e-40	up
SI65_05762	hypothetical protein	1.26505	3.16567e-40	up
SI65_05590	hypothetical protein	-2.30134	4.26406e-40	down
SI65_07337	hypothetical protein	2.63723	6.23968e-40	up
SI65_08993	hypothetical protein	1.32773	1.04408e-39	up
SI65_02239	hypothetical protein	-1.64164	9.11801e-39	down
SI65_03890	hypothetical protein	2.18026	2.56782e-38	up
SI65_08520	hypothetical protein	-1.51827	4.32644e-38	down
SI65_09202	hypothetical protein	3.46027	4.32644e-38	up
SI65_03994	hypothetical protein	-3.64517	1.06358e-37	down
SI65_05589	hypothetical protein	-2.45684	1.22461e-37	down
SI65_06673	hypothetical protein	-2.10514	2.11637e-37	down
SI65_04679	hypothetical protein	1.83966	2.55689e-37	up
SI65_02267	hypothetical protein	-1.80834	2.59642e-37	down
SI65_07265	hypothetical protein	2.43372	5.03582e-37	up
SI65_00367	hypothetical protein	-2.58749	1.48911e-36	down
SI65_09980	hypothetical protein	1.26368	2.34093e-36	up
SI65_06839	hypothetical protein	-1.21581	2.8684e-36	down
SI65_03725	hypothetical protein	1.76237	2.95647e-36	up
SI65_03294	hypothetical protein	1.29536	4.00623e-35	up
SI65_09007	hypothetical protein	2.1084	4.00623e-35	up
SI65_05588	hypothetical protein	-1.55201	1.36174e-34	down
SI65_02263	hypothetical protein	1.80379	2.92193e-34	up
SI65_07252	hypothetical protein	1.27859	4.91902e-33	up
SI65_09185	hypothetical protein	-2.30938	1.40735e-32	down
SI65_07248	hypothetical protein	1.24959	5.45776e-32	up
SI65_06758	hypothetical protein	-2.1968	1.16566e-31	down
SI65_09097	hypothetical protein	1.3689	1.4319e-31	up
SI65_07251	hypothetical protein	1.38346	1.53484e-31	up
SI65_07541	hypothetical protein	-1.4797	4.69538e-31	down
SI65_09799	hypothetical protein	-2.23002	1.59482e-30	down
SI65_01471	hypothetical protein	2.81622	1.77657e-30	up
SI65_07199	hypothetical protein	-1.32776	1.90561e-30	down
SI65_07428	hypothetical protein	-3.4064	3.42705e-30	down
SI65_09181	hypothetical protein	-13.9775	5.53033e-30	down
SI65_01963	hypothetical protein	-1.38187	3.02972e-29	down
SI65_01919	hypothetical protein	-1.38187	3.02972e-29	down
SI65_07493	hypothetical protein	1.81178	5.19717e-29	up
SI65_03271	hypothetical protein	-1.53259	1.04576e-28	down
SI65_01536	hypothetical protein	-2.26636	1.10128e-28	down
SI65_06478	hypothetical protein	1.99405	1.35927e-28	up
SI65_05749	hypothetical protein	-2.14559	2.54469e-28	down
SI65_00401	hypothetical protein	-1.48764	2.70425e-28	down
SI65_06787	hypothetical protein	-1.30801	4.31616e-28	down
SI65_00007	hypothetical protein	3.46586	4.57716e-28	up
SI65_04854	hypothetical protein	-1.34291	4.90596e-28	down
SI65_10028	hypothetical protein	-2.14961	4.90596e-28	down
SI65_03336	hypothetical protein	-4.94927	2.47214e-27	down
SI65_10188	hypothetical protein	1.23014	3.80575e-27	up
SI65_09009	hypothetical protein	13.1909	8.88219e-27	up
SI65_07415	hypothetical protein	-1.9233	1.10268e-26	down
SI65_06037	hypothetical protein	-13.1116	1.60825e-26	down
SI65_10171	hypothetical protein	-1.80777	1.75732e-26	down
SI65_02181	hypothetical protein	2.55948	6.06833e-26	up
SI65_07713	Nitrate reductase [NADPH]	1.94894	6.47063e-26	up
SI65_09011	hypothetical protein	12.9451	7.83967e-26	up
SI65_07774	hypothetical protein	-2.12691	2.40169e-25	down
SI65_09932	hypothetical protein	-2.29983	2.81078e-25	down
SI65_08108	hypothetical protein	1.10292	3.68458e-25	up
SI65_02778	Regulatory protein brlA	-1.54782	5.49965e-25	down
SI65_05883	hypothetical protein	-1.47303	3.20813e-24	down
SI65_06071	hypothetical protein	1.37863	3.77933e-24	up
SI65_05319	hypothetical protein	-1.75976	4.77141e-24	down
SI65_01537	hypothetical protein	-2.68822	5.07062e-24	down
SI65_03722	hypothetical protein	1.48027	5.50904e-24	up
SI65_00093	hypothetical protein	-1.03777	6.12024e-24	down
SI65_09956	hypothetical protein	2.35893	1.38887e-23	up
SI65_03272	hypothetical protein	-1.3011	1.79107e-23	down
SI65_07292	hypothetical protein	-1.34654	1.86049e-23	down
SI65_03293	hypothetical protein	-2.85147	5.19577e-23	down
SI65_04185	hypothetical protein	-1.86964	5.30861e-23	down
SI65_00122	Glutamate decarboxylase 1	1.16046	6.79769e-23	up
SI65_04502	hypothetical protein	1.40326	1.50632e-22	up
SI65_10068	hypothetical protein	-1.84282	1.88102e-22	down
SI65_09010	hypothetical protein	12.0414	2.53037e-22	up
SI65_07032	hypothetical protein	-1.31076	2.5922e-22	down
SI65_09782	hypothetical protein	-1.47367	2.5922e-22	down
SI65_07604	hypothetical protein	-1.30223	2.76094e-22	down
SI65_03275	hypothetical protein	-1.54957	4.02138e-22	down
SI65_05138	Isopentenyl-diphosphate Delta-isomerase	1.73981	6.32334e-22	up
SI65_06261	hypothetical protein	2.39834	8.75604e-22	up
SI65_08839	IMP-specific 5'-nucleotidase 1	1.34664	2.99561e-21	up
SI65_08137	hypothetical protein	-1.09326	3.69368e-21	down
SI65_06021	hypothetical protein	-11.6506	6.99445e-21	down
SI65_04406	hypothetical protein	1.29824	7.68366e-21	up
SI65_07249	hypothetical protein	1.11536	8.32564e-21	up
SI65_00483	Anthranilate synthase component 1	1.13981	9.11741e-21	up
SI65_00014	hypothetical protein	-1.7825	4.45436e-20	down
SI65_03270	hypothetical protein	-2.56796	6.67449e-20	down
SI65_08046	Catalase	-1.36952	6.85701e-20	down
SI65_03273	hypothetical protein	-1.4087	9.85041e-20	down
SI65_07712	Nitrite reductase [NAD(P)H]	1.88606	1.33407e-19	up
SI65_03668	Acetyl-CoA carboxylase	1.49187	1.93001e-19	up
SI65_04709	hypothetical protein	1.93574	1.96705e-19	up
SI65_03355	hypothetical protein	-1.25895	3.71004e-19	down
SI65_05069	hypothetical protein	-3.03644	3.71004e-19	down
SI65_00413	Isocitrate lyase	-1.34408	3.96597e-19	down
SI65_05966	hypothetical protein	1.52801	4.41757e-19	up
SI65_06463	hypothetical protein	1.68303	5.15291e-19	up
SI65_02195	hypothetical protein	-1.21663	7.5383e-19	down
SI65_04218	hypothetical protein	-1.10187	9.34028e-19	down
SI65_07284	hypothetical protein	3.14284	9.85597e-19	up
SI65_03723	hypothetical protein	1.86037	1.12365e-18	up
SI65_04042	hypothetical protein	4.03694	1.57543e-18	up
SI65_06010	hypothetical protein	-6.68135	1.81918e-18	down
SI65_05422	hypothetical protein	-3.36726	2.01728e-18	down
SI65_06047	hypothetical protein	-10.9047	3.04937e-18	down
SI65_00015	hypothetical protein	-1.21641	3.44613e-18	down
SI65_03339	hypothetical protein	1.04933	3.69463e-18	up
SI65_06039	hypothetical protein	-10.8864	4.24058e-18	down
SI65_05996	hypothetical protein	-10.8602	6.19613e-18	down
SI65_07250	hypothetical protein	2.22495	7.45465e-18	up
SI65_01071	hypothetical protein	1.08707	9.70832e-18	up
SI65_09823	Endoglucanase A	1.40697	1.00526e-17	up
SI65_06023	hypothetical protein	-10.7748	1.02407e-17	down
SI65_09179	hypothetical protein	-10.7564	1.05596e-17	down
SI65_04752	hypothetical protein	2.61901	1.07097e-17	up
SI65_01355	hypothetical protein	-2.80887	1.15945e-17	down
SI65_05995	hypothetical protein	-10.7374	1.22959e-17	down
SI65_07639	hypothetical protein	-10.7374	1.22959e-17	down
SI65_09243	hypothetical protein	1.45899	1.3384e-17	up
SI65_07972	hypothetical protein	1.29719	1.4288e-17	up
SI65_09180	hypothetical protein	-10.6645	2.6977e-17	down
SI65_08978	hypothetical protein	-1.39876	3.15677e-17	down
SI65_09039	hypothetical protein	-2.13843	1.09198e-16	down
SI65_00170	hypothetical protein	-1.33286	1.09712e-16	down
SI65_06020	hypothetical protein	-10.4803	1.11923e-16	down
SI65_09436	hypothetical protein	-1.4963	1.43537e-16	down
SI65_00468	hypothetical protein	-1.5759	1.43537e-16	down
SI65_06837	hypothetical protein	1.1034	1.52765e-16	up
SI65_04236	hypothetical protein	-1.15933	1.56396e-16	down
SI65_00609	hypothetical protein	1.17716	1.91542e-16	up
SI65_08234	hypothetical protein	-1.00741	1.91542e-16	down
SI65_05997	hypothetical protein	-10.3794	2.06687e-16	down
SI65_00713	hypothetical protein	1.3236	2.44358e-16	up
SI65_06705	hypothetical protein	-1.48577	2.94328e-16	down
SI65_06596	hypothetical protein	-2.73755	3.31769e-16	down
SI65_03044	hypothetical protein	-1.09272	4.00357e-16	down
SI65_01400	hypothetical protein	1.53204	4.90772e-16	up
SI65_09038	hypothetical protein	-1.67967	4.92194e-16	down
SI65_06031	hypothetical protein	-3.74739	4.93056e-16	down
SI65_09374	hypothetical protein	2.42241	5.90611e-16	up
SI65_07200	hypothetical protein	-1.15383	6.54778e-16	down
SI65_00633	hypothetical protein	1.00901	7.67645e-16	up
SI65_04710	hypothetical protein	-5.93269	1.07589e-15	down
SI65_02779	hypothetical protein	-2.90356	1.34658e-15	down
SI65_00619	hypothetical protein	1.15891	1.36817e-15	up
SI65_07257	hypothetical protein	-3.63636	1.38304e-15	down
SI65_06026	hypothetical protein	-10.0614	1.9532e-15	down
SI65_06044	hypothetical protein	-10.0167	2.84484e-15	down
SI65_06024	hypothetical protein	-9.98076	4.1512e-15	down
SI65_05380	putative mannosyl-oligosaccharide alpha-1,2-mannosidase 1B	-1.22517	5.41654e-15	down
SI65_00804	hypothetical protein	1.24836	6.35141e-15	up
SI65_07301	hypothetical protein	1.06425	6.85003e-15	up
SI65_07038	hypothetical protein	1.22219	6.88167e-15	up
SI65_08790	hypothetical protein	-3.37652	7.01335e-15	down
SI65_07785	hypothetical protein	1.26442	7.07211e-15	up
SI65_03306	hypothetical protein	-1.04645	7.17371e-15	down
SI65_06575	hypothetical protein	1.14784	9.79747e-15	up
SI65_00099	hypothetical protein	2.10882	1.59048e-14	up
SI65_03724	hypothetical protein	1.20668	3.26894e-14	up
SI65_01353	putative oxidoreductase	-1.40624	3.86407e-14	down
SI65_05993	hypothetical protein	-9.63104	6.70068e-14	down
SI65_07494	hypothetical protein	2.73118	6.96424e-14	up
SI65_05399	hypothetical protein	-1.11647	7.18651e-14	down
SI65_04948	hypothetical protein	-3.82622	8.40599e-14	down
SI65_01777	hypothetical protein	1.76143	9.02666e-14	up
SI65_02104	hypothetical protein	1.76143	9.02666e-14	up
SI65_10356	hypothetical protein	1.16349	1.12187e-13	up
SI65_08910	hypothetical protein	1.2733	1.16552e-13	up
SI65_06383	hypothetical protein	1.52048	1.27102e-13	up
SI65_09357	hypothetical protein	-1.55566	1.43026e-13	down
SI65_08695	hypothetical protein	1.01011	1.57771e-13	up
SI65_10323	hypothetical protein	-2.655	3.12607e-13	down
SI65_04327	putative endo-1,4-beta-xylanase C	-1.80637	3.1288e-13	down
SI65_06445	hypothetical protein	-1.09087	3.13188e-13	down
SI65_07441	hypothetical protein	-1.2277	3.35066e-13	down
SI65_10228	hypothetical protein	-6.77527	4.13807e-13	down
SI65_02141	hypothetical protein	-9.31379	4.15102e-13	down
SI65_01742	hypothetical protein	-9.31379	4.15102e-13	down
SI65_00714	Kynureninase 2	1.23463	4.57889e-13	up
SI65_06001	hypothetical protein	-9.29019	5.89024e-13	down
SI65_00660	hypothetical protein	1.71768	7.38705e-13	up
SI65_02480	hypothetical protein	1.3685	1.25929e-12	up
SI65_00298	hypothetical protein	1.63262	1.40479e-12	up
SI65_05772	hypothetical protein	3.51201	1.50845e-12	up
SI65_00930	hypothetical protein	1.06112	1.81746e-12	up
SI65_08354	hypothetical protein	-1.5235	2.03466e-12	down
SI65_04249	hypothetical protein	1.00649	2.05295e-12	up
SI65_07682	hypothetical protein	-1.35298	2.20978e-12	down
SI65_06006	hypothetical protein	-8.97729	2.23828e-12	down
SI65_03302	hypothetical protein	-2.83751	2.98509e-12	down
SI65_09188	hypothetical protein	4.30729	4.49828e-12	up
SI65_03988	hypothetical protein	-1.32532	6.33852e-12	down
SI65_06219	hypothetical protein	-1.05408	6.76204e-12	down
SI65_09047	hypothetical protein	-1.05124	6.8035e-12	down
SI65_10096	Mono- and diacylglycerol lipase	1.27299	7.34512e-12	up
SI65_05332	hypothetical protein	2.41129	1.04937e-11	up
SI65_09553	hypothetical protein	-1.15944	1.06944e-11	down
SI65_05192	putative ATP-citrate synthase subunit 1	1.05436	1.19734e-11	up
SI65_09470	hypothetical protein	-1.75399	1.65828e-11	down
SI65_07264	hypothetical protein	1.41273	1.70679e-11	up
SI65_05998	hypothetical protein	-4.2346	1.73868e-11	down
SI65_05234	hypothetical protein	1.2844	1.89177e-11	up
SI65_06000	hypothetical protein	-8.77224	2.08364e-11	down
SI65_01226	hypothetical protein	1.0799	2.21664e-11	up
SI65_06046	hypothetical protein	-8.76313	2.27713e-11	down
SI65_05773	hypothetical protein	4.20524	2.32004e-11	up
SI65_01602	hypothetical protein	8.72392	2.95424e-11	up
SI65_06042	hypothetical protein	-8.7043	2.99905e-11	down
SI65_08011	hypothetical protein	1.4556	3.25709e-11	up
SI65_06573	hypothetical protein	1.35325	3.30403e-11	up
SI65_08264	putative alpha agdC	-1.04426	3.3215e-11	down
SI65_03266	hypothetical protein	-2.18688	3.88525e-11	down
SI65_06016	hypothetical protein	-8.65357	4.08061e-11	down
SI65_06672	hypothetical protein	-2.61189	4.39226e-11	down
SI65_09008	hypothetical protein	2.05109	4.56643e-11	up
SI65_02255	hypothetical protein	8.6671	4.61108e-11	up
SI65_08848	hypothetical protein	-2.69559	5.8424e-11	down
SI65_09733	hypothetical protein	1.25092	5.89406e-11	up
SI65_00474	hypothetical protein	1.17707	6.32362e-11	up
SI65_07268	hypothetical protein	-1.44733	7.23099e-11	down
SI65_06017	hypothetical protein	-8.62907	8.18731e-11	down
SI65_03292	hypothetical protein	-1.16637	1.32094e-10	down
SI65_03337	hypothetical protein	-4.64602	1.32094e-10	down
SI65_05769	hypothetical protein	2.97225	1.69869e-10	up
SI65_00359	hypothetical protein	-8.47932	1.76817e-10	down
SI65_09732	hypothetical protein	1.81806	1.8517e-10	up
SI65_06004	hypothetical protein	-8.44528	1.87962e-10	down
SI65_10185	hypothetical protein	-1.23534	1.88903e-10	down
SI65_06929	hypothetical protein	1.57087	2.0487e-10	up
SI65_01982	hypothetical protein	-1.959	2.69544e-10	down
SI65_04742	hypothetical protein	-1.08148	2.86023e-10	down
SI65_08174	hypothetical protein	-1.36881	2.98421e-10	down
SI65_07727	hypothetical protein	1.15344	3.42474e-10	up
SI65_08405	hypothetical protein	1.8205	3.42474e-10	up
SI65_10181	steroid dehydrogenase	-1.21608	3.9833e-10	down
SI65_03312	hypothetical protein	1.85908	4.37569e-10	up
SI65_04506	hypothetical protein	1.90941	5.52907e-10	up
SI65_01470	hypothetical protein	-3.81957	5.67473e-10	down
SI65_00180	Glucoamylase	1.109	6.01627e-10	up
SI65_04670	hypothetical protein	1.73855	6.28291e-10	up
SI65_08638	hypothetical protein	-1.21756	6.83983e-10	down
SI65_07592	General amino-acid permease GAP1	-1.8956	7.00714e-10	down
SI65_03265	hypothetical protein	-2.08124	7.64556e-10	down
SI65_08164	hypothetical protein	-1.54869	8.47498e-10	down
SI65_05771	hypothetical protein	3.46999	8.69551e-10	up
SI65_01082	hypothetical protein	-1.11448	9.07271e-10	down
SI65_07680	hypothetical protein	2.1588	9.10854e-10	up
SI65_07412	hypothetical protein	1.10553	1.16507e-09	up
SI65_05015	hypothetical protein	1.238	1.23153e-09	up
SI65_06408	hypothetical protein	-1.52369	1.29991e-09	down
SI65_05770	hypothetical protein	3.02696	1.30883e-09	up
SI65_01760	Meiotic recombination protein DMC1	1.08153	1.33713e-09	up
SI65_02122	Meiotic recombination protein DMC1	1.08153	1.33713e-09	up
SI65_03269	hypothetical protein	-2.14799	1.59463e-09	down
SI65_06867	hypothetical protein	-1.21998	1.81818e-09	down
SI65_07867	hypothetical protein	-1.18408	2.31791e-09	down
SI65_02852	hypothetical protein	1.01638	3.35664e-09	up
SI65_00612	hypothetical protein	-1.17641	3.47005e-09	down
SI65_00313	hypothetical protein	-1.25552	3.57186e-09	down
SI65_00470	hypothetical protein	1.2334	4.20681e-09	up
SI65_01610	hypothetical protein	-1.18657	5.0531e-09	down
SI65_09218	hypothetical protein	2.79811	5.3499e-09	up
SI65_09182	hypothetical protein	-4.08997	5.54915e-09	down
SI65_09306	hypothetical protein	-1.08864	5.70738e-09	down
SI65_09201	hypothetical protein	4.02333	5.89178e-09	up
SI65_05768	hypothetical protein	3.51397	5.96518e-09	up
SI65_08318	hypothetical protein	1.36595	6.17146e-09	up
SI65_09840	hypothetical protein	-1.67381	6.44205e-09	down
SI65_08885	hypothetical protein	-1.54126	6.64055e-09	down
SI65_04505	hypothetical protein	4.13504	9.13263e-09	up
SI65_02199	ABC transporter CDR4	1.30302	9.22292e-09	up
SI65_07308	hypothetical protein	1.19072	1.24948e-08	up
SI65_05158	hypothetical protein	-1.14344	1.47004e-08	down
SI65_07934	hypothetical protein	1.10225	1.56675e-08	up
SI65_00772	hypothetical protein	3.60421	1.84547e-08	up
SI65_07452	hypothetical protein	2.01218	1.86631e-08	up
SI65_00701	hypothetical protein	1.35153	2.22417e-08	up
SI65_08119	hypothetical protein	1.21045	2.30513e-08	up
SI65_02305	hypothetical protein	-1.02803	2.81807e-08	down
SI65_09946	hypothetical protein	-1.1687	2.86318e-08	down
SI65_08207	hypothetical protein	1.98059	3.1562e-08	up
SI65_00574	hypothetical protein	-1.02555	3.23649e-08	down
SI65_06011	hypothetical protein	-7.58297	3.66566e-08	down
SI65_09119	hypothetical protein	-1.06431	4.30733e-08	down
SI65_01572	hypothetical protein	-1.21698	5.3698e-08	down
SI65_02823	hypothetical protein	3.57119	6.27647e-08	up
SI65_07823	hypothetical protein	-1.00696	7.85347e-08	down
SI65_00630	Molybdenum cofactor sulfurase	1.82344	9.4985e-08	up
SI65_10231	hypothetical protein	-6.33403	1.00457e-07	down
SI65_05767	hypothetical protein	2.06646	1.02796e-07	up
SI65_03574	putative cytochrome b5	-1.3161	1.03691e-07	down
SI65_06277	hypothetical protein	1.09133	1.07554e-07	up
SI65_04510	hypothetical protein	1.06113	1.50198e-07	up
SI65_03064	putative methyltransferase BUD23	-1.00881	1.55226e-07	down
SI65_03335	hypothetical protein	-7.12067	1.56137e-07	down
SI65_07407	hypothetical protein	1.22125	1.79985e-07	up
SI65_09667	hypothetical protein	1.7714	1.86305e-07	up
SI65_06889	hypothetical protein	-1.50757	2.39372e-07	down
SI65_00176	Glucoamylase	-1.08525	2.39865e-07	down
SI65_05321	hypothetical protein	-1.92434	2.56363e-07	down
SI65_01200	hypothetical protein	-1.45067	3.14413e-07	down
SI65_09012	hypothetical protein	7.23124	3.23415e-07	up
SI65_02513	hypothetical protein	-1.13458	3.6654e-07	down
SI65_09197	hypothetical protein	-4.78447	4.72162e-07	down
SI65_09338	hypothetical protein	-2.71034	4.89603e-07	down
SI65_05198	hypothetical protein	-1.10432	7.13715e-07	down
SI65_07177	hypothetical protein	-1.11243	7.4536e-07	down
SI65_03603	hypothetical protein	1.17881	7.53026e-07	up
SI65_07269	hypothetical protein	-2.49892	7.83733e-07	down
SI65_00006	hypothetical protein	2.06194	7.91244e-07	up
SI65_08696	hypothetical protein	1.45103	8.07082e-07	up
SI65_08206	hypothetical protein	1.47462	8.84114e-07	up
SI65_06246	hypothetical protein	1.0661	8.87396e-07	up
SI65_00669	hypothetical protein	-1.08935	9.08222e-07	down
SI65_02254	hypothetical protein	1.19895	9.89067e-07	up
SI65_05895	hypothetical protein	-1.09706	1.06497e-06	down
SI65_00917	hypothetical protein	-1.83857	1.06772e-06	down
SI65_05123	hypothetical protein	1.05125	1.09837e-06	up
SI65_08985	hypothetical protein	-1.03486	1.28838e-06	down
SI65_06114	hypothetical protein	-1.09561	1.32561e-06	down
SI65_09165	hypothetical protein	-5.91878	1.47217e-06	down
SI65_09178	hypothetical protein	-6.94452	1.57998e-06	down
SI65_09196	hypothetical protein	-2.48395	1.59345e-06	down
SI65_10013	hypothetical protein	1.65231	1.65624e-06	up
SI65_09337	hypothetical protein	-1.33968	1.88669e-06	down
SI65_06002	hypothetical protein	-6.9616	2.01362e-06	down
SI65_04680	hypothetical protein	1.23981	2.04099e-06	up
SI65_08602	hypothetical protein	-3.81098	2.16012e-06	down
SI65_02970	hypothetical protein	2.32857	2.42447e-06	up
SI65_06007	hypothetical protein	-6.92242	2.5838e-06	down
SI65_02344	hypothetical protein	-2.9155	2.64249e-06	down
SI65_09798	hypothetical protein	-1.35378	2.72784e-06	down
SI65_05245	putative feruloyl esterase A	-3.60025	3.04056e-06	down
SI65_00042	hypothetical protein	-1.5493	3.10242e-06	down
SI65_08047	hypothetical protein	-1.53799	3.1333e-06	down
SI65_00912	3-phytase A	1.01542	3.45664e-06	up
SI65_00661	hypothetical protein	-1.88639	3.54309e-06	down
SI65_10155	hypothetical protein	1.58993	3.69258e-06	up
SI65_04755	hypothetical protein	1.28529	3.75708e-06	up
SI65_04878	hypothetical protein	5.00573	4.471e-06	up
SI65_06827	hypothetical protein	-1.03749	4.56627e-06	down
SI65_06956	hypothetical protein	-1.05868	5.35465e-06	down
SI65_04790	hypothetical protein	1.1162	5.57905e-06	up
SI65_02863	hypothetical protein	-1.46117	5.61633e-06	down
SI65_06740	hypothetical protein	2.34291	6.23379e-06	up
SI65_04807	hypothetical protein	-1.56131	6.4445e-06	down
SI65_06546	hypothetical protein	-1.09268	6.63582e-06	down
SI65_09920	Aldehyde dehydrogenase	1.10822	7.09044e-06	up
SI65_06008	hypothetical protein	-6.86909	7.71545e-06	down
SI65_09945	hypothetical protein	-1.05918	8.28565e-06	down
SI65_03918	hypothetical protein	-3.94154	9.37295e-06	down
SI65_06560	hypothetical protein	-1.29973	1.05661e-05	down
SI65_10012	hypothetical protein	-4.31808	1.11932e-05	down
SI65_07969	hypothetical protein	-1.88956	1.15219e-05	down
SI65_00358	hypothetical protein	-4.34775	1.17147e-05	down
SI65_09168	hypothetical protein	2.2775	1.30131e-05	up
SI65_08170	hypothetical protein	-1.40313	1.32192e-05	down
SI65_00062	hypothetical protein	1.45041	1.35321e-05	up
SI65_00991	hypothetical protein	-1.15883	1.4034e-05	down
SI65_06313	hypothetical protein	-1.91027	1.46113e-05	down
SI65_01935	hypothetical protein	-1.18258	1.49791e-05	down
SI65_01946	hypothetical protein	-1.18258	1.49791e-05	down
SI65_08455	hypothetical protein	1.17939	1.50529e-05	up
SI65_09014	hypothetical protein	6.52139	1.63482e-05	up
SI65_10009	putative beta-glucosidase M	-1.86952	1.66405e-05	down
SI65_09918	hypothetical protein	1.17835	1.73732e-05	up
SI65_01598	Regulatory protein abaA	-1.04876	1.86858e-05	down
SI65_06018	hypothetical protein	-6.47394	1.88985e-05	down
SI65_04137	hypothetical protein	1.12233	2.05447e-05	up
SI65_10361	hypothetical protein	1.04786	2.39263e-05	up
SI65_03740	hypothetical protein	2.2007	2.55829e-05	up
SI65_06244	hypothetical protein	2.03538	2.70125e-05	up
SI65_07961	hypothetical protein	2.04835	2.80191e-05	up
SI65_06040	hypothetical protein	-1.19763	3.60058e-05	down
SI65_03730	hypothetical protein	1.65764	3.61649e-05	up
SI65_02230	hypothetical protein	-1.24587	3.83399e-05	down
SI65_04204	hypothetical protein	1.53652	3.8403e-05	up
SI65_08321	hypothetical protein	-6.33363	3.912e-05	down
SI65_00652	hypothetical protein	2.60382	4.33638e-05	up
SI65_00911	hypothetical protein	-1.13166	4.61072e-05	down
SI65_04386	hypothetical protein	-1.99803	4.7834e-05	down
SI65_02147	hypothetical protein	-2.2962	5.18541e-05	down
SI65_10271	hypothetical protein	-1.25859	5.74447e-05	down
SI65_09164	hypothetical protein	-6.29232	5.76001e-05	down
SI65_01737	hypothetical protein	-3.08414	5.92345e-05	down
SI65_05988	hypothetical protein	-1.63853	6.51863e-05	down
SI65_06025	hypothetical protein	-6.21675	7.44602e-05	down
SI65_04487	hypothetical protein	-1.32223	7.56397e-05	down
SI65_04662	Guanyl-specific ribonuclease T1	2.29693	7.84167e-05	up
SI65_09821	putative feruloyl esterase A	-1.40949	8.02283e-05	down
SI65_00785	hypothetical protein	-1.96353	8.244e-05	down
SI65_09163	hypothetical protein	-6.28811	8.37292e-05	down
SI65_02780	Ribonuclease T2	1.79741	9.47719e-05	up
SI65_08194	hypothetical protein	-1.43125	9.48787e-05	down
SI65_00476	hypothetical protein	1.3749	9.9646e-05	up
SI65_10069	hypothetical protein	-1.9336	0.000100697	down
SI65_02926	hypothetical protein	-1.29951	0.000102519	down
SI65_00210	hypothetical protein	-1.1632	0.000102808	down
SI65_09780	hypothetical protein	2.05641	0.000113483	up
SI65_09162	hypothetical protein	-5.76315	0.000117298	down
SI65_05159	hypothetical protein	1.03743	0.000119	up
SI65_10014	hypothetical protein	3.34319	0.00014003	up
SI65_06554	hypothetical protein	-1.12604	0.000140546	down
SI65_06009	hypothetical protein	-5.79537	0.000149997	down
SI65_06909	hypothetical protein	-1.146	0.000183551	down
SI65_00097	hypothetical protein	1.53664	0.000186773	up
SI65_05254	hypothetical protein	1.52497	0.000192475	up
SI65_09661	hypothetical protein	6.07136	0.000240147	up
SI65_08828	hypothetical protein	-1.48393	0.000263422	down
SI65_06276	hypothetical protein	1.07081	0.000264312	up
SI65_04727	Alcohol dehydrogenase 1	-1.53569	0.000295485	down
SI65_06036	hypothetical protein	-3.29548	0.000325333	down
SI65_03176	hypothetical protein	-3.09439	0.000338064	down
SI65_06057	hypothetical protein	-1.33216	0.000346604	down
SI65_02194	hypothetical protein	-1.45585	0.000353282	down
SI65_08538	hypothetical protein	-1.02561	0.000399554	down
SI65_06834	hypothetical protein	1.05711	0.000404218	up
SI65_00061	hypothetical protein	1.44809	0.000415912	up
SI65_06595	hypothetical protein	-2.70143	0.000430408	down
SI65_08417	hypothetical protein	-2.39031	0.000450977	down
SI65_06038	hypothetical protein	-2.18779	0.000453388	down
SI65_04064	hypothetical protein	1.60364	0.000484072	up
SI65_06032	GTP cyclohydrolase 1	-5.89231	0.000486437	down
SI65_00655	hypothetical protein	1.51433	0.000505024	up
SI65_08578	hypothetical protein	1.85217	0.00051013	up
SI65_05184	hypothetical protein	2.07007	0.000610258	up
SI65_06022	hypothetical protein	-5.81702	0.000650307	down
SI65_01740	hypothetical protein	-5.78096	0.000669874	down
SI65_02144	hypothetical protein	-5.78096	0.000669874	down
SI65_09042	hypothetical protein	-3.11894	0.00076256	down
SI65_09609	hypothetical protein	-2.27714	0.0008305	down
SI65_02834	hypothetical protein	1.00381	0.000835225	up
SI65_06675	hypothetical protein	-3.64799	0.000875664	down
SI65_03491	putative formate dehydrogenase	1.11296	0.000893489	up
SI65_05999	hypothetical protein	-5.67926	0.000895118	down
SI65_08120	hypothetical protein	1.14625	0.000912722	up
SI65_04687	hypothetical protein	-2.16907	0.000925958	down
SI65_00792	hypothetical protein	1.22164	0.000972214	up
SI65_08573	hypothetical protein	-1.54979	0.00103324	down
SI65_03125	hypothetical protein	-1.52875	0.00104732	down
SI65_03675	hypothetical protein	2.17928	0.00109491	up
SI65_06014	hypothetical protein	-5.62859	0.00110953	down
SI65_01406	hypothetical protein	-5.73956	0.00113828	down
SI65_06003	hypothetical protein	-5.63743	0.00118886	down
SI65_00124	hypothetical protein	-1.29568	0.00122627	down
SI65_05562	hypothetical protein	-1.73891	0.00126655	down
SI65_08118	hypothetical protein	1.24332	0.00130289	up
SI65_05035	hypothetical protein	4.98538	0.00130289	up
SI65_10230	hypothetical protein	-5.65415	0.00130811	down
SI65_00664	hypothetical protein	1.59173	0.00137243	up
SI65_04661	hypothetical protein	1.0891	0.00137561	up
SI65_05923	hypothetical protein	-1.07308	0.00142616	down
SI65_02189	Benzoate 4-monooxygenase	-1.10877	0.00146505	down
SI65_00613	hypothetical protein	1.15708	0.00151039	up
SI65_07987	hypothetical protein	-1.02149	0.00153114	down
SI65_08847	hypothetical protein	-2.82703	0.00164125	down
SI65_09118	hypothetical protein	-1.91728	0.00165797	down
SI65_05083	hypothetical protein	2.0543	0.00165959	up
SI65_05593	hypothetical protein	-1.01532	0.00167463	down
SI65_01646	hypothetical protein	2.34313	0.00172848	up
SI65_05728	hypothetical protein	1.64303	0.00174665	up
SI65_04715	Acid phosphatase	1.49979	0.00182348	up
SI65_04266	hypothetical protein	-1.59799	0.0018652	down
SI65_09175	hypothetical protein	-5.45064	0.00189592	down
SI65_01918	hypothetical protein	1.02248	0.00192159	up
SI65_01964	hypothetical protein	1.02248	0.00192159	up
SI65_06180	hypothetical protein	-5.49577	0.00194759	down
SI65_08934	hypothetical protein	-1.09782	0.00197262	down
SI65_09752	hypothetical protein	-1.15872	0.00204984	down
SI65_07198	hypothetical protein	-1.85449	0.00205069	down
SI65_10233	hypothetical protein	-5.40067	0.00238317	down
SI65_06473	hypothetical protein	-1.44348	0.00242511	down
SI65_09339	hypothetical protein	-2.30843	0.00247001	down
SI65_07266	hypothetical protein	1.42621	0.00256757	up
SI65_06034	hypothetical protein	-5.42852	0.00257474	down
SI65_08230	hypothetical protein	5.43029	0.00271032	up
SI65_02528	hypothetical protein	-2.44575	0.00277555	down
SI65_00212	hypothetical protein	-1.06621	0.00282467	down
SI65_04681	hypothetical protein	1.27747	0.0028633	up
SI65_08954	hypothetical protein	3.15396	0.00309808	up
SI65_04238	hypothetical protein	-1.06944	0.00315964	down
SI65_06570	hypothetical protein	-1.32064	0.00330332	down
SI65_09734	hypothetical protein	-1.44293	0.00339353	down
SI65_04663	hypothetical protein	1.7762	0.00356274	up
SI65_00155	hypothetical protein	-1.76404	0.00365484	down
SI65_00068	hypothetical protein	2.12989	0.00419116	up
SI65_09910	hypothetical protein	-3.86386	0.00420989	down
SI65_00446	hypothetical protein	-3.28724	0.00429995	down
SI65_08052	hypothetical protein	1.66975	0.00458489	up
SI65_05839	hypothetical protein	-1.22581	0.00464691	down
SI65_01454	hypothetical protein	-1.54432	0.00467965	down
SI65_08789	hypothetical protein	1.46355	0.00479487	up
SI65_04632	hypothetical protein	-2.27266	0.00495602	down
SI65_04328	putative alpha-L-arabinofuranosidase axhA-1	-1.0525	0.00503342	down
SI65_04043	hypothetical protein	2.80884	0.00561414	up
SI65_02368	hypothetical protein	1.86678	0.00593309	up
SI65_09169	hypothetical protein	1.22782	0.0060294	up
SI65_03276	hypothetical protein	-2.89351	0.00606583	down
SI65_04566	putative aspergillopepsin A-like aspartic endopeptidase	-1.15892	0.00607762	down
SI65_05717	hypothetical protein	1.10889	0.00631146	up
SI65_09909	Cutinase 3	-1.46533	0.00664489	down
SI65_04788	hypothetical protein	1.20246	0.00675117	up
SI65_09045	hypothetical protein	1.25332	0.00697265	up
SI65_09907	hypothetical protein	1.74454	0.00718103	up
SI65_04044	hypothetical protein	1.05543	0.00764685	up
SI65_04286	hypothetical protein	1.04306	0.00769173	up
SI65_00113	hypothetical protein	-1.52443	0.00772582	down
SI65_09839	hypothetical protein	1.01468	0.00788287	up
SI65_07267	hypothetical protein	1.59298	0.00790845	up
SI65_09994	hypothetical protein	-1.92777	0.00830089	down
SI65_05265	hypothetical protein	-1.25083	0.00862971	down
SI65_04403	hypothetical protein	-1.63317	0.00996793	down
SI65_04215	hypothetical protein	-1.6398	0.00999503	down
SI65_09166	hypothetical protein	-1.1534	0.010367	down
SI65_09970	hypothetical protein	-1.15972	0.0116365	down
SI65_09332	hypothetical protein	-1.47808	0.0118524	down
SI65_10325	hypothetical protein	-2.07878	0.012528	down
SI65_03260	hypothetical protein	-4.89377	0.0128979	down
SI65_00133	hypothetical protein	1.37636	0.0132593	up
SI65_08809	hypothetical protein	-1.1642	0.0135523	down
SI65_09177	hypothetical protein	-4.88095	0.0137865	down
SI65_10114	hypothetical protein	-1.61972	0.0142486	down
SI65_07237	hypothetical protein	1.11239	0.0143985	up
SI65_07283	hypothetical protein	1.56677	0.0148083	up
SI65_05356	hypothetical protein	-1.0739	0.0163487	down
SI65_06566	hypothetical protein	1.07054	0.016372	up
SI65_02854	hypothetical protein	1.85242	0.0184999	up
SI65_06638	hypothetical protein	-4.52033	0.0195047	down
SI65_00161	hypothetical protein	-1.24801	0.0197941	down
SI65_04951	hypothetical protein	-1.16551	0.0200462	down
SI65_06901	putative agmatinase 1	2.35047	0.0208423	up
SI65_02256	hypothetical protein	4.82746	0.0217785	up
SI65_02343	hypothetical protein	-1.29436	0.0224622	down
SI65_10080	hypothetical protein	-1.73723	0.0229482	down
SI65_05416	hypothetical protein	-1.40176	0.0231995	down
SI65_10123	hypothetical protein	3.05886	0.0233764	up
SI65_04396	hypothetical protein	-1.23694	0.0237784	down
SI65_00784	hypothetical protein	1.29417	0.0238085	up
SI65_00098	hypothetical protein	1.28254	0.0247068	up
SI65_10092	hypothetical protein	-1.17953	0.0247986	down
SI65_04711	hypothetical protein	-1.27706	0.0263803	down
SI65_09040	hypothetical protein	-2.85444	0.0271044	down
SI65_04059	hypothetical protein	-1.49845	0.0279267	down
SI65_08846	hypothetical protein	-1.14499	0.0294388	down
SI65_09978	hypothetical protein	3.79812	0.0307872	up
SI65_08851	hypothetical protein	-1.69838	0.0346981	down
SI65_04281	hypothetical protein	-1.61343	0.0347076	down
SI65_01654	hypothetical protein	1.41404	0.0365307	up
SI65_05293	hypothetical protein	-1.11582	0.0386974	down
SI65_07325	hypothetical protein	-4.50681	0.039255	down
SI65_00599	hypothetical protein	1.03186	0.0394451	up
SI65_10232	hypothetical protein	-4.53198	0.0399104	down
SI65_08599	hypothetical protein	-3.11449	0.0399144	down
SI65_02851	hypothetical protein	2.25695	0.0402845	up
SI65_00201	hypothetical protein	-1.81454	0.0404793	down
SI65_09792	hypothetical protein	1.61377	0.0408094	up
SI65_00980	hypothetical protein	-1.4065	0.0427086	down
SI65_03997	hypothetical protein	-1.07906	0.0429845	down
SI65_06938	hypothetical protein	-1.13505	0.0429845	down
SI65_00055	hypothetical protein	-1.34802	0.0452465	down
SI65_04459	hypothetical protein	-3.41956	0.0469064	down
SI65_08475	hypothetical protein	-1.06159	0.0471642	down
SI65_04357	hypothetical protein	1.69536	0.0475874	up
SI65_09721	hypothetical protein	-1.6032	0.0477143	down
SI65_04799	hypothetical protein	1.47588	0.0477894	up
SI65_03212	hypothetical protein	-1.1515	0.0489794	down
